# Supplementary material
Source: PubMed Central journal article supplement (PMC7923850)
Supplement: mmc1.pdf [file mmc1.pdf]

**SUPPLEMENTARY DATA**

**TABLE OF CONTENTS**

**Figure 1 of the supplementary data**

**HOPE Participating hospitals**

**Principal investigators, per center**

**Scientific committee**

**Collaborators.**

**Figure 1 of the supplementary data**

Standardized differences and distribution of propensity scores

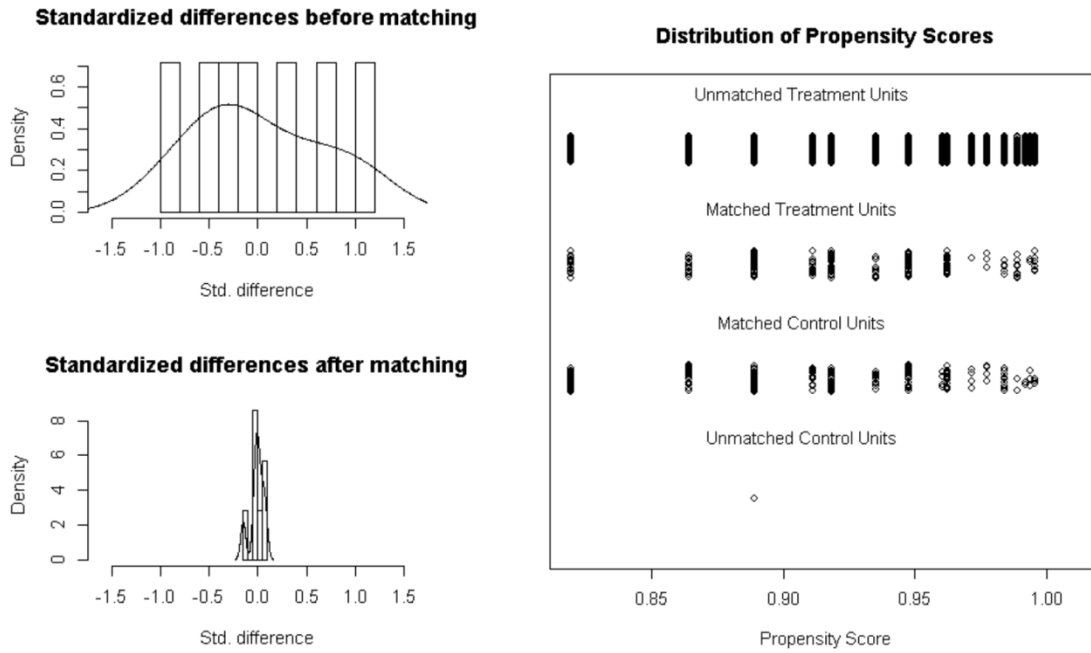

**HOPE Participating hospitals and valid recruitment (interim cutoff, included in the present analysis), updated on April 3, 2020**

|    | Hospital                                             | City       | Country | Valid recruitment, April 3, 2020 |
|----|------------------------------------------------------|------------|---------|----------------------------------|
| 1  | San Carlo Clinic                                     | Milan      | Italy   | -                                |
| 2  | Hospital Clínico Universitario de Valladolid         | Valladolid | Spain   | 97                               |
| 3  | London Health Sciences Centre                        | London     | Canada  | -                                |
| 4  | Hospital IMED Valencia                               | Valencia   | Spain   | 3                                |
| 5  | Ospedali Riuniti "Umberto I - Lancisi - Salesi"      | Ancona     | Italy   | 1                                |
| 6  | Institute of Cardiology and Cardiovascular Surgery   | Havana     | Cuba    | -                                |
| 7  | Hospital Clínico Universitario Virgen de la Victoria | Malaga     | Spain   | 115                              |
| 8  | Complejo hospitalario de Toledo                      | Toledo     | Spain   | 2                                |
| 9  | San Giovanni Battista                                | Torino     | Italy   | 7                                |
| 10 | Policlinico A. Gemelli IRCSS                         | Rome       | Italy   | 1                                |
| 11 | Hospital Nuestra Señora de América                   | Madrid     | Spain   | 53                               |
| 12 | Policlinico Umberto I                                | Rome       | Italy   | -                                |
| 13 | University Medical Center Mannheim                   | Mannheim   | Germany | 102*                             |
| 14 | The Third People's Hospital of Shenzhen              | Shenzhen   | China   | -                                |
| 15 | Centro Cardiologico Monzino, IRCCS                   | Milan      | Italy   | 46                               |

|    |                                                                                      |                        |         |     |
|----|--------------------------------------------------------------------------------------|------------------------|---------|-----|
| 16 | Complejo Hospitalario Universitario de Santiago de Compostela                        | Santiago de Compostela | Spain   | 41  |
| 17 | Hospital Universitario Guadalajara                                                   | Guadalajara            | Spain   | 49  |
| 18 | Hospital Clínico de Valencia                                                         | Valencia               | Spain   | 1   |
| 19 | Hospital Clínico San Carlos                                                          | Madrid                 | Spain   | 371 |
| 20 | Hospital Severo Ochoa                                                                | Leganés                | Spain   | 56  |
| 21 | Hospital Joan XXIII                                                                  | Tarragona              | Spain   | 2   |
| 22 | San Luigi Gonzaga University Hospital, Orbassano and Rivoli Infermi Hospital, Rivoli | Turin                  | Italy   | 11  |
| 23 | Hospital General del norte de Guayaquil IESS Los Ceibos                              | Guayaquil              | Ecuador | 11  |
| 24 | Hospital Clínico Universitario Virgen de la Arrixaca                                 | Murcia                 | Spain   | 1   |
| 25 | Hospital Virgen del Mar                                                              | Madrid                 | Spain   | 9   |
| 26 | Azienda ospedaliero-universitaria consorziale policlinico di Bari                    | Bari                   | Italy   | 22  |
| 27 | Hospital Universitario Getafe                                                        | Madrid                 | Spain   | 19  |
| 28 | University Hospital Álvaro Cunqueiro                                                 | Vigo                   | Spain   | 1   |
| 29 | Hospital Universitario La Paz                                                        | Madrid                 | Spain   | -   |
| 30 | Martini Hospital, via Tofane, Turin.                                                 | Turin                  | Italy   | -   |
| 31 | San Giovanni Bosco, ASL Città di Torino, Turin, Italy                                | Turin                  | Italy   | -   |

\* 6 were treated as inpatients, the rest as outpatients.

**First and second principal investigators**

| Name          | Surname         | Center                                                                                              | City                   | Country |
|---------------|-----------------|-----------------------------------------------------------------------------------------------------|------------------------|---------|
| Bernardo      | Cortese         | San Carlo Clinic                                                                                    | Milan                  | Italy   |
| Aitor         | Uribarri        | Hospital Clínico Universitario de Valladolid                                                        | Valladolid             | Spain   |
| Rodrigo       | Bagur           | London Health Sciences Centre                                                                       | London                 | Canada  |
| Oscar         | Fabregat-Andres | Hospital IMED Valencia                                                                              | Valencia               | Spain   |
| Federico      | Guerra          | Ospedali Riuniti "Umberto I - Lancisi - Salesi"                                                     | Ancona                 | Italy   |
| Emilio        | Alfonso         | Institute of Cardiology and Cardiovascular Surgery                                                  | Havana                 | Cuba    |
| Victor Manuel | Becerra-Muñoz   | Hospital Clínico Universitario Virgen de la Victoria                                                | Malaga                 | Spain   |
| Daniela       | Trabattoni      | Centro Cardiologico Monzino, IRCCS                                                                  | Milan                  | Italy   |
| Jose          | Moreu           | Complejo hospitalario de Toledo                                                                     | Toledo                 | Spain   |
| Fabrizio      | D'Ascenzo       | San Giovanni Battista                                                                               | Turin                  | Italy   |
| Danilo        | Buosenso        | Policlinico A. Gemelli IRCCS                                                                        | Rome                   | Italy   |
| Gisela        | Feltes Guzman   | Hospital Nuestra Señora de América                                                                  | Madrid                 | Spain   |
| Massimo       | Mancone         | Policlinico Umberto I                                                                               | Rome                   | Italy   |
| Ibrahim       | El-Battrawy     | University Medical Center Mannheim                                                                  | Mannheim               | Germany |
| Jia           | Huang           | The Third People's Hospital of Shenzhen                                                             | Shenzhen               | China   |
| Javier        | Lopez-Pais      | Complejo Hospitalario Universitario de Santiago de Compostela                                       | Santiago de Compostela | Spain   |
| María C.      | Viana-LLamas    | Hospital Universitario Guadalajara                                                                  | Guadalajara            | Spain   |
| Jaime         | Signes-Costa    | Hospital Clínico de Valencia                                                                        | Valencia               | Spain   |
| Vicente       | Estrada         | Hospital Clínico San Carlos                                                                         | Madrid                 | Spain   |
| Inmaculada    | Fernández Rozas | Hospital Severo Ochoa                                                                               | Leganés                | Spain   |
| Alfredo       | Bardají         | Hospital Joan XXIII                                                                                 | Tarragona              | Spain   |
| Enrico        | Cerrato         | San Luigi Gonzaga University Hospital, Orbassano and Rivoli Infermi Hospital, Rivoli (Turin), Italy | Turin                  | Italy   |
| Alex Fernando | Castro-Mejía    | Hospital General del norte de Guayaquil IESS Los Ceibos                                             | Guayaquil              | Ecuador |

|                 |                   |                                                                   |                        |         |
|-----------------|-------------------|-------------------------------------------------------------------|------------------------|---------|
| Francisco       | Marín             | Hospital Clínico Universitario Virgen de la Arrixaca              | Murcia                 | Spain   |
| Thamar          | Capel Astrua      | Hospital Virgen del Mar                                           | Madrid                 | Spain   |
| Martino         | Pepe              | Azienda ospedaliero-universitaria consorziale policlinico di Bari | Bari                   | Italy   |
| Rodolfo         | Romero            | Hospital Universitario Getafe                                     | Madrid                 | Spain   |
| Sergio          | Raposeiras Roubin | University Hospital Álvaro Cunqueiro                              | Vigo                   | Spain   |
| Charbel         | Maroun Eid        | Hospital Universitario La Paz                                     | Madrid                 | Spain   |
| Maurizio        | Bertaina          | Martini Hospital, via Tofane, Turin.                              | Turin                  | Italy   |
| Mario           | Iannaccone        | San Giovanni Bosco, ASL Città di Torino, Turin, Italy             | Turin                  | Italy   |
| Gaetano         | Di Palma          | San Carlo Clinic                                                  | Milan                  | Italy   |
| Álvaro          | Aparisi           | Hospital Clínico Universitario de Valladolid                      | Valladolid             | Spain   |
| Antonio         | Dello Russo       | Ospedali Riuniti "Umberto I - Lancisi - Salesi"                   | Ancona                 | Italy   |
| Juan Jose       | Gomez-Doblas      | Hospital Clínico Universitario Virgen de la Victoria              | Malaga                 | Spain   |
| Massimo         | Mapelli           | Centro Cardiologico Monzino, IRCCS                                | Milan                  | Italy   |
| Davide          | Pata              | Policlinico A. Gemelli IRCCS                                      | Rome                   | Italy   |
| Asunción        | Guerra            | Hospital Nuestra Señora de América                                | Madrid                 | Spain   |
| Fabio           | Infusino          | Policlinico Umberto I                                             | Rome                   | Italy   |
| Ibrahim         | Akin              | University Medical Center Mannheim                                | Mannheim               | Germany |
| Lei             | Liu               | The Third People's Hospital of Shenzhen                           | Shenzhen               | China   |
| José María      | García-Acuña      | Complejo Hospitalario Universitario de Santiago de Compostela     | Santiago de Compostela | Spain   |
| Ramón           | Arroyo-Espliguero | Hospital Universitario Guadalajara                                | Guadalajara            | Spain   |
| Carmen          | Castellanos Lluch | Hospital Clínico de Valencia                                      | Valencia               | Spain   |
| Angel           | Molino            | Hospital Clínico San Carlos                                       | Madrid                 | Spain   |
| Matteo          | Bianco            | San Luigi Gonzaga University Hospital, Orbassano (Turin), Italy   | Turin                  | Italy   |
| María Elizabeth | Ortega Armas      | Hospital General del norte de Guayaquil IESS Los Ceibos           | Guayaquil              | Ecuador |

|         |                   |                                                                   |        |       |
|---------|-------------------|-------------------------------------------------------------------|--------|-------|
| Elisa   | García-Vazquez    | Hospital Clínico Universitario Virgen de la Arrixaca              | Murcia | Spain |
| Chinh   | Pham Trung        | Hospital Virgen del Mar                                           | Madrid | Spain |
| Gaetano | Brindicci         | Azienda ospedaliero-universitaria consorziale policlinico di Bari | Bari   | Italy |
| Edoardo | Manzone           | Hospital Universitario Getafe                                     | Madrid | Spain |
| Karim   | Jamhour Chelh     | University Hospital Álvaro Cunqueiro                              | Vigo   | Spain |
| Lubna   | Dani Ben Abdellah | Hospital Universitario La Paz                                     | Madrid | Spain |
| Fabio   | De Iaco           | Martini Hospital, via Tofane, Turin.                              | Turin  | Italy |
| Giacomo | Bocuzzi           | San Giovanni Bosco, ASL Città di Torino, Turin, Italy             | Turin  | Italy |

**Scientific committee**

| NameE                    | Affiliation                                                                                         | County        |
|--------------------------|-----------------------------------------------------------------------------------------------------|---------------|
| Iván J Núñez-Gil         | Hospital Clínico San Carlos, Madrid                                                                 | Spain         |
| Carlos Macaya            | Hospital Clínico San Carlos, Madrid                                                                 | Spain         |
| Asunción Guerri          | Hospital Nuestra Señora de América, Madrid                                                          | Spain         |
| Charles Lefranc          | Hospital Nuestra Señora de América, Madrid                                                          | Spain         |
| David Orgaz              | Primary Care, Madrid                                                                                | Spain         |
| Enma Gil Higes           | Primary Care, Madrid                                                                                | Spain         |
| Juan Conesa              | Hospital Clínico San Carlos, Madrid                                                                 | Spain         |
| Antonio Fernandez Ortiz  | Hospital Clínico San Carlos, Madrid                                                                 | Spain         |
| Harish Ramakhrisna       | Mayo Clinic, Rochester                                                                              | United States |
| Julio Jimenez            | SUMMA 112, Madrid                                                                                   | Spain         |
| Vanessa Garcia de Biedma | Hospital Universitario de Fuenlabrada                                                               | Spain         |
| Ruth Sendino             | Primary Care, Vitoria                                                                               | Spain         |
| Gisela Feltes            | Hospital Nuestra Señora de América, Madrid                                                          | Spain         |
| Sergio Raposeiras        | Hospital Álvaro Cunqueiro, Vigo                                                                     | Spain         |
| Giusseppe Biondi Zoccai  | Sapienza University of Rome, Latina, Italy                                                          | Italy         |
| Angel Molino             | Hospital Clínico San Carlos, Madrid                                                                 | Spain         |
| Cristina Fernandez       | Hospital Clínico San Carlos, Madrid                                                                 | Spain         |
| Vicente Estrada          | Hospital Clínico San Carlos, Madrid                                                                 | Spain         |
| Fabrizio D'Ascenzo       | Città della Salute e della Scienza, Turin                                                           | Italy         |
| Enrico Cerrato           | San Luigi Gonzaga University Hospital, Orbassano and Rivoli Infermi Hospital, Rivoli (Turin), Italy | Italy         |
| F. Javier Martin-Sanchez | Hospital Clínico San Carlos, Madrid                                                                 | Spain         |



**Collaborators (April 3, 2020).**

| Center                                               | City       | Country | Name                                                                                                                                                                                                                                    |
|------------------------------------------------------|------------|---------|-----------------------------------------------------------------------------------------------------------------------------------------------------------------------------------------------------------------------------------------|
| San Carlo Clinic                                     | Milan      | Italy   |                                                                                                                                                                                                                                         |
| Hospital Clínico Universitario de Valladolid         | Valladolid | Spain   |                                                                                                                                                                                                                                         |
| London Health Sciences Centre                        | London     | Canada  |                                                                                                                                                                                                                                         |
| Hospital IMED Valencia                               | Valencia   | Spain   |                                                                                                                                                                                                                                         |
| Ospedali Riuniti "Umberto I - Lancisi - Salesi"      | Ancona     | Italy   | Giulia Stronati                                                                                                                                                                                                                         |
| Institute of Cardiology and Cardiovascular Surgery   | Havana     | Cuba    | Emilio Alfonso<br>Giselle López                                                                                                                                                                                                         |
| Hospital Clínico Universitario Virgen de la Victoria | Malaga     | Spain   | Eva Cabrera-Cesar<br>Belén Murcia-Casas<br>Álvaro Martínez-Mesa<br>Esther Sánchez-Álvarez<br>Victoria Doncel-Abad<br>Pilar Nuevo-Ortega<br>Carmen Pérez-López<br>Guillermo Ojeda-Burgos<br>Javier Sánchez-Lora<br>Jesús Santos-González |
| Centro Cardiologico Monzino, IRCCS                   | Milan      | Italy   | Francesca Susini<br>Giulia Santagostino<br>Sebastiano Gili<br>Giovanni Teruzzi<br>Massimo Mapelli<br>Ricardo Maragna<br>Irene Mattavelli<br>Elisabetta Salvioni                                                                         |

|                                    |        |       |                                                                                                                                                                                                           |
|------------------------------------|--------|-------|-----------------------------------------------------------------------------------------------------------------------------------------------------------------------------------------------------------|
| Complejo Hospitalario de Toledo    | Toledo | Spain | Tomás Canton<br>Esther Lázaro<br>Luis Manuel Hernando<br>Luis Fernando Pajín                                                                                                                              |
| San Giovanni Battista              | Torino | Italy | Ovidio De Filippo<br>Guglielmo Gallone<br>Francesco Bruno<br>Gaetano Maria De Ferrari<br>Luca Franchin<br>Filippo Angelini<br>Pierluigi Omedé<br>Federico Conrotto<br>Mauro Pennone<br>Antonio Montefusco |
| Policlinico A. Gemelli IRCSS       | Rome   | Italy | Davide Pata<br>Danilo Buosenso<br>Piero Valentini<br>Antonio Gatto<br>Antonio Chiaretti                                                                                                                   |
| Hospital Nuestra Señora de América | Madrid | Spain | Carmen Díaz Sánchez<br>José Luis Moreno Hurtrez<br>Charles Lefranc<br>María Luisa Sheriff Prosper.                                                                                                        |
| Policlinico Umberto I              | Rome   | Italy | Ilaria Birtolo<br>Paolo Severino<br>Francesco Pugliese<br>Francesco Fedele<br>Gabriella d'Ettorre<br>Giacchino Galardo<br>Claudio Maria Mastroianni<br>Nicola Salvi                                       |

|                                                               |                        |         |                                                                                                                                                                                     |
|---------------------------------------------------------------|------------------------|---------|-------------------------------------------------------------------------------------------------------------------------------------------------------------------------------------|
|                                                               |                        |         | Sara Cimino<br>Carlo Lavallo                                                                                                                                                        |
| University Medical Center Mannheim                            | Mannheim               | Germany | Ibrahim El-Battrawy<br>Mohammad Abumayyaleh<br>Ibrahim Akin.                                                                                                                        |
| The Third People's Hospital of Shenzhen                       | Shenzhen               | China   | Fulan Cen<br>Song Wang<br>Manfei Zeng<br>Liping Qiu<br>Fangfan Ye<br>Yajing Huang                                                                                                   |
| Complejo Hospitalario Universitario de Santiago de Compostela | Santiago de Compostela | Spain   | Diego López-Otero<br>Taboada Muñiz                                                                                                                                                  |
| Hospital Universitario Guadalajara                            | Guadalajara            | Spain   |                                                                                                                                                                                     |
| Hospital Clínico de Valencia                                  | Valencia               | Spain   | María Jose Forner<br>Vicente Bodi<br>Elvira Bondia<br>Paloma Albiol<br>Nerea Perez-Solé<br>Alba Mulet<br>Ana de Gracia<br>Lucía Fernández-Presa<br>Clara Bonanad<br>Joaquín Canoves |
| Hospital Clínico San Carlos                                   | Madrid                 | Spain   | Oscar Vedia<br>Carlos Vergara<br>Víctor Hugo Moreno Munguía<br>Francisco Javier Martin<br>José Tomás Ramos<br>Miriam de La Puente Yague<br>Juana María Brenes Sánchez               |

|                                                                                                     |           |         |                                                                                                                                                                                                                                                                                                                                                                                                                                                                                                                                                                                                                                                                                                                                                                                                                                                           |
|-----------------------------------------------------------------------------------------------------|-----------|---------|-----------------------------------------------------------------------------------------------------------------------------------------------------------------------------------------------------------------------------------------------------------------------------------------------------------------------------------------------------------------------------------------------------------------------------------------------------------------------------------------------------------------------------------------------------------------------------------------------------------------------------------------------------------------------------------------------------------------------------------------------------------------------------------------------------------------------------------------------------------|
|                                                                                                     |           |         | <p>Inés Gil Prados<br/>                 Isabel Fernández<br/>                 María Arantzazu Álvarez de Arcaya<br/>                 María Ángeles Cuadrado<br/>                 Carlos Elvira<br/>                 Andrea Valcárcel Alonso,<br/>                 María del Rosario Iguaran Bermúdez,<br/>                 Carmen Blasco-Fanlo<br/>                 Cristina Villamor Jimenez,<br/>                 Cristina Botella Moreno,<br/>                 Ernesto Mora Fernández<br/>                 Jesús Jacob<br/>                 Carlos Ignacio Garcia-Asenjo<br/>                 Carmen Cuervo Molinero<br/>                 Iñigo Sagastagoitia Fornie<br/>                 Federico Cuesta Triana<br/>                 Juncal Perez- Somarriba<br/>                 Angel Nieto Sánchez<br/>                 Lara, Guardado Fuentes</p> |
| Hospital Severo Ochoa                                                                               | Leganés   | Spain   | María Molina                                                                                                                                                                                                                                                                                                                                                                                                                                                                                                                                                                                                                                                                                                                                                                                                                                              |
| Hospital Joan XXIII                                                                                 | Tarragona | Spain   |                                                                                                                                                                                                                                                                                                                                                                                                                                                                                                                                                                                                                                                                                                                                                                                                                                                           |
| San Luigi Gonzaga University Hospital, Orbassano and Rivoli Infermi Hospital, Rivoli (Turin), Italy | Turin     | Italy   | <p>Amanda Spirito<br/>                 Flavio Pietrangiollillo<br/>                 Salvatore Campagnuolo</p>                                                                                                                                                                                                                                                                                                                                                                                                                                                                                                                                                                                                                                                                                                                                             |
| Hospital General del norte de Guayaquil IESS Los Ceibos                                             | Guayaquil | Ecuador | <p>Erick Alexander Jara León<br/>                 Galo Guillermo Farfán Cano<br/>                 Fernando Aníbal Marmol Mosquera<br/>                 Luis Alfonso Moreno Rondón<br/>                 Diego Raúl Villavicencio García<br/>                 Eric Antonio Álava Montesdeoca<br/>                 José Luis Rodríguez Campos</p>                                                                                                                                                                                                                                                                                                                                                                                                                                                                                                            |

|                                                                   |        |       |                                                                                                                                                                                                                                                                                           |
|-------------------------------------------------------------------|--------|-------|-------------------------------------------------------------------------------------------------------------------------------------------------------------------------------------------------------------------------------------------------------------------------------------------|
| Hospital Clínico Universitario Virgen de la Arrixaca              | Murcia | Spain | Jose Miguel Rivera-Caravaca<br>Pablo Gil-Pérez<br>Cecilia López-García<br>Domingo Pascual-Figal<br>Antonio Tello-Montoliu<br>Encarnación Moral Escudero<br>Alicia Hernández Torres<br>Aychel Elena Roura Piloto                                                                           |
| Hospital Virgen del Mar                                           | Madrid | Spain | Oriol Casals Rafecas<br>Victoria Márquez Fernández<br>María Jesús González Juárez<br>Ada Viviana Romero Echeverry<br>Paola Tatiana García Giraldo<br>Carlos de la Fuente Gutiérrez<br>Manuel Montes Lluch<br>María Eugenia García Ramírez<br>Joaquín Solís Jiménez<br>Reina García Closas |
| Azienda ospedaliero-universitaria consorziale policlinico di Bari | Bari   | Italy | Palma Luisa Nestola<br>Maria Grazia Carmela La Marca<br>Gioacchino Angarano<br>Annalisa Saracino<br>Onofrio Resta<br>Giovanna Elisiana Carpagnano<br>Enrico Buonamico<br>Salvatore Grasso<br>Lidia Dalfino<br>Rachele Iannuzziello                                                        |
| Hospital Universitario Getafe                                     | Madrid | Spain | Virginia Álvarez<br>Silvia Bleda<br>Silvia Odeh                                                                                                                                                                                                                                           |

|                                                       |        |       |                                                                                                                                                                                                                                                                         |
|-------------------------------------------------------|--------|-------|-------------------------------------------------------------------------------------------------------------------------------------------------------------------------------------------------------------------------------------------------------------------------|
|                                                       |        |       | Gema Núñez<br>María Isabel Ortega<br>Joaquín Jesús Alonso<br>Alfonso Fraile                                                                                                                                                                                             |
| University Hospital Álvaro Cunqueiro                  | Vigo   | Spain | Emad Abu-Assi<br>Andrés Iñiguez Romo<br>Dolores Vila<br>María Teresa Pérez Rodríguez<br>Alexandre Pérez                                                                                                                                                                 |
| Hospital Universitario La Paz                         | Madrid | Spain | María Angélica Rivera Núñez<br>Clara Cabre-Verdiell Surribas<br>Victoria Lo Iacono García<br>Rosario Torres Santos Olmo<br>Berta Antón Huguet<br>Isabel Arenas Berenguer<br>Berta Alonso González<br>Begoña Reche Martínez<br>Mikel Rico Brías<br>Lorena López Corcuera |
| Martini Hospital, via Tofane, Turin.                  | Turin  | Italy | Francesco Fioravanti<br>Luca Franchin                                                                                                                                                                                                                                   |
| San Giovanni Bosco, ASL Città di Torino, Turin, Italy | Turin  | Italy | Umberto Annone                                                                                                                                                                                                                                                          |
